# Supplementary material for: Transcriptome and Metabolome Profiling Provide New Insights into Disuse Muscle Atrophy in Chicken: The Potential Role of Fast-Twitch Muscle Fibers
Source: MDPI journal article supplement (doi:10.3390/ijms25063516), 2024-03-20
Supplement: s1 [file s1]

Table S1. Primers used for qPCR

| Fragment name      | Fragment sequences(5' to 3') | Size (bp) |
|--------------------|------------------------------|-----------|
| Atrogin-1(F)       | TCAACGGGTCGGCAAGTCT          | 201       |
| Atrogin-1(R)       | TCCCTCCCATCGCTCAGTC          |           |
| MURF1(F)           | GGACGAGCGGATCAACAT           | 218       |
| MURF1(R)           | GGGAGATGATGGTCTGGATG         |           |
| SOX6(F)            | TCAGGTTCAGGGTCACATGCC        | 179       |
| SOX6(R)            | TTGCTGGAGCTGTAAAGGGC         |           |
| TNNC1(F)           | GTTGAGCAGTTGACAGAAGA         | 180       |
| TNNC1(R)           | GAACCATCATAACAAGGAAC         |           |
| TNNC2(F)           | GAGCAGCAAAGATGGCGTCA         | 222       |
| TNNC2(R)           | ATCACCGTGCCCAACTCCTT         |           |
| TNNI1(F)           | GAGGAGTGGGAGCAGGAGAT         | 194       |
| TNNI1(R)           | TTCGTCCACAATCTCAACCT         |           |
| TNNT1(F)           | GAGCCGCACGGAGAAGGAGC         | 197       |
| TNNT1(R)           | CCCGAAGTGGGGCATGTTGG         |           |
| PGAM1(F)           | GCGAGGCTCAGGTGAAGAT          | 150       |
| PGAM1(R)           | GTCCTCCGTCAGGTCAGC           |           |
| PGK1(F)            | CCCTGGATAAGGTGGATG           | 186       |
| PGK1(R)            | TTGTCAGGCATGGGAACT           |           |
| PYGL(F)            | ACATTTGCCTACACGAACC          | 204       |
| PYGL(R)            | TGCCTCCCTCCTCTATCA           |           |
| GPI(F)             | ATTCACTTTGGGAGCAATC          | 217       |
| GPI(R)             | ACTCCAACCTCTGGCTCAAT         |           |
| HK1(F)             | CTGGATCTCGGTGGTTCTTAC        | 168       |
| HK1(R)             | TTGTCGGCACGGGAAAGA           |           |
| CPT1(F)            | GCTTATTGTAGTTGTGGGTG         | 175       |
| CPT1(R)            | AAAGTTTGCCGTGTTTCA           |           |
| FASN(F)            | CGCAGGCATAGCAGGAAA           | 195       |
| FASN(R)            | CCAAAGAAGGAGGCATCAA          |           |
| OXSM(F)            | ACATAACAGCACCTAATCC          | 183       |
| OXSM(R)            | ATGGGACGTAATTGAGAT           |           |
| COX2(F)            | GTAGATGCCCAAGAAGTT           | 192       |
| COX2(R)            | GTTTGATTAGTCGTCCAG           |           |
| $\beta$ -globin(F) | CAGCCAGGTGGAGGATTT           | 188       |
| $\beta$ -globin(R) | GAATAGGAGGACCCTCTGTTAG       |           |
| $\beta$ -actin(F)  | GATATTGCTGCGCTCGTTG          | 197       |
| $\beta$ -actin(R)  | TTCAGGGTCAGGATACCTCTTT       |           |
