# Supplementary figures and images for: Transcriptome and Metabolome Profiling Provide New Insights into Disuse Muscle Atrophy in Chicken: The Potential Role of Fast-Twitch Muscle Fibers
Source: MDPI journal article supplement (doi:10.3390/ijms25063516), 2024-03-20

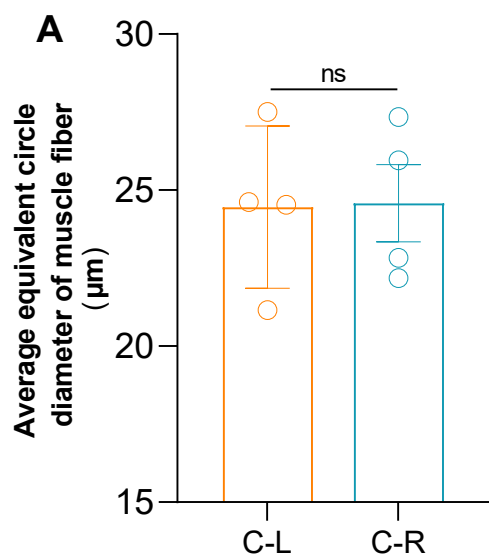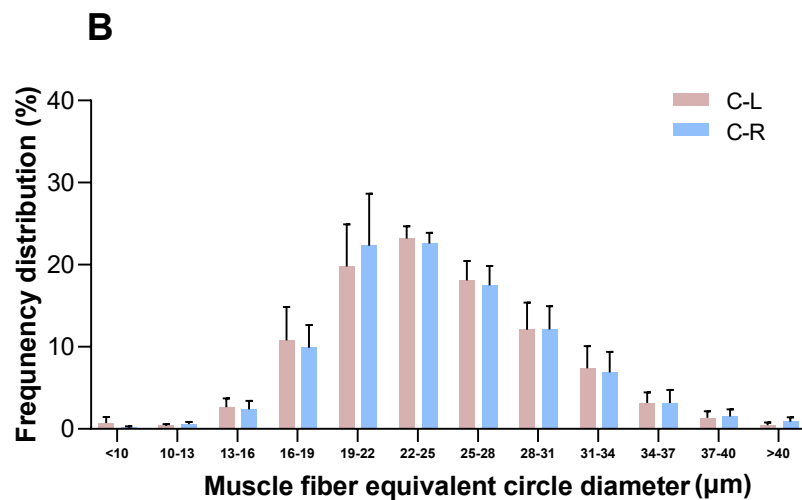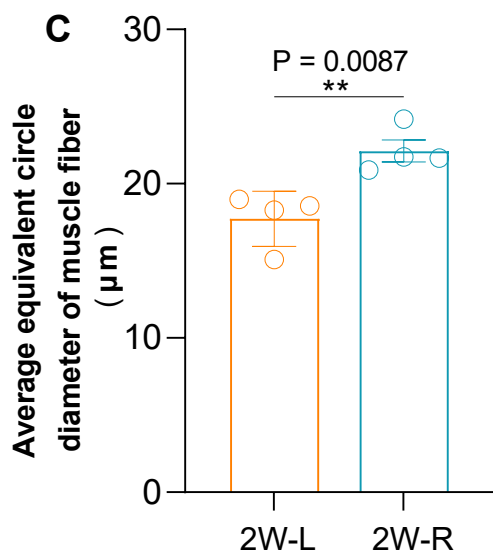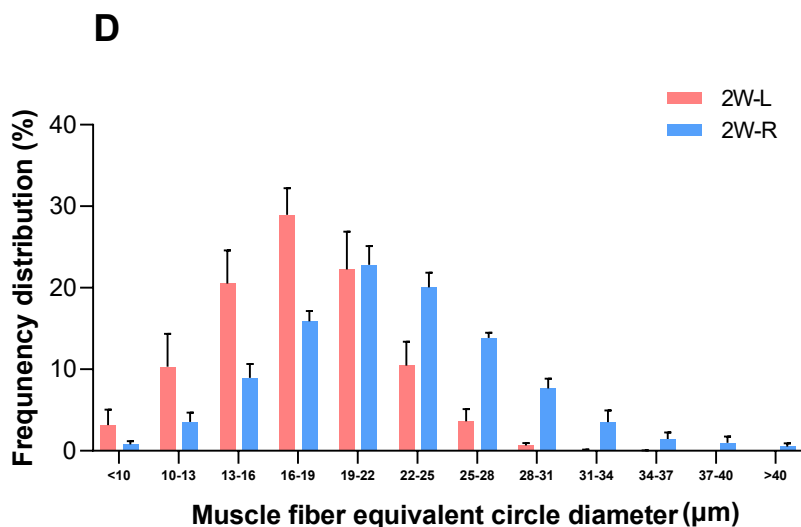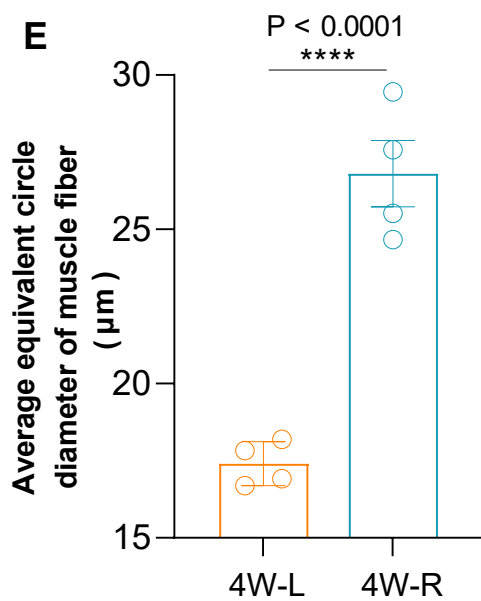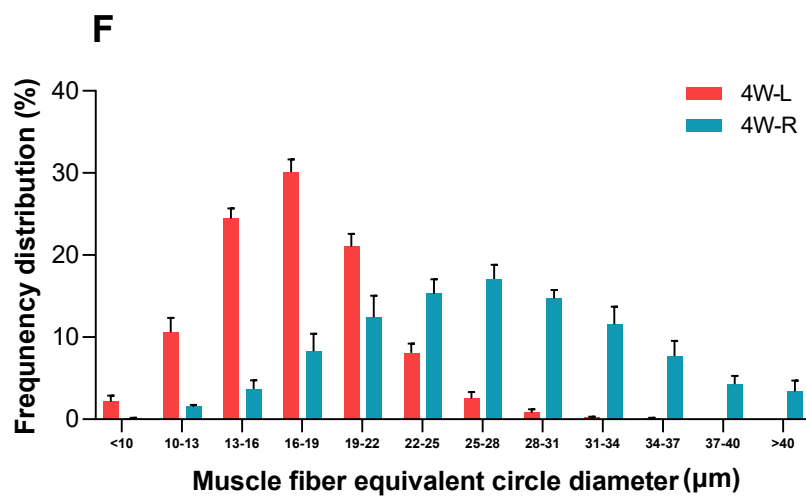

Supplement: s1 [file s1]

**A**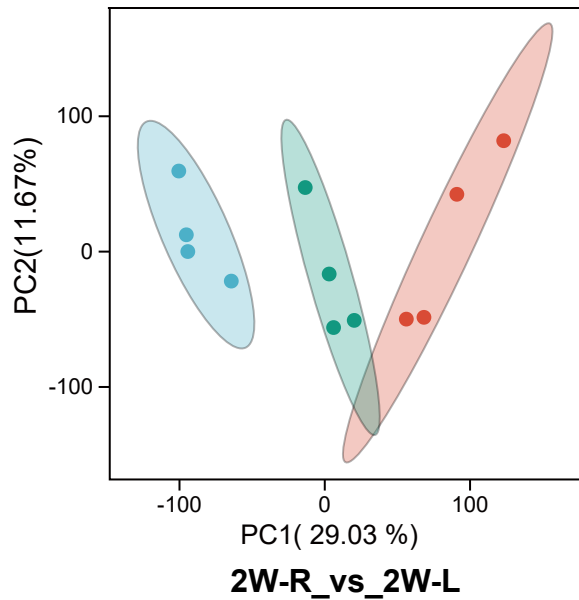**B**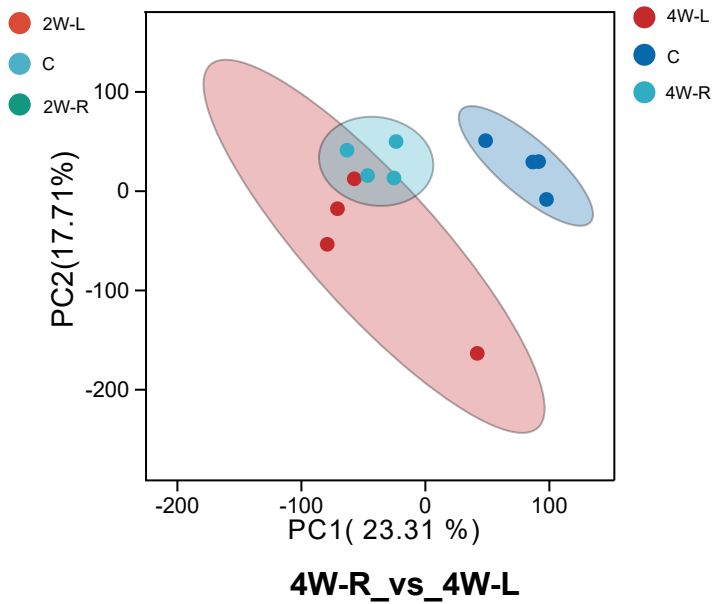

Supplement: s1 [file s1]

A

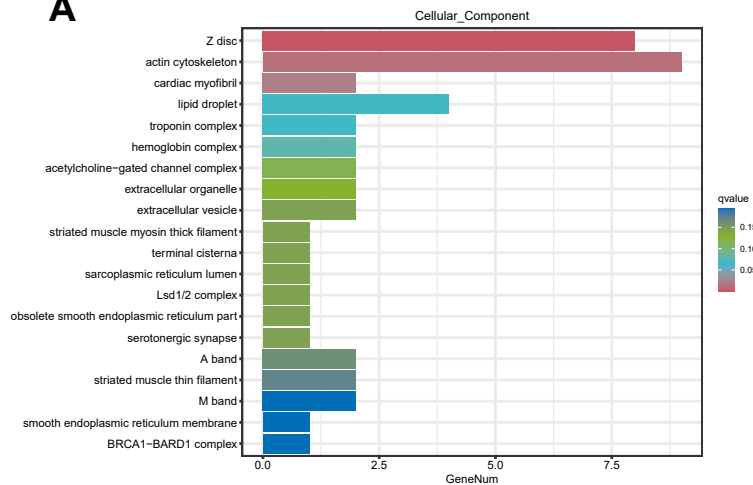

2W-R\_vs\_2W-L

B

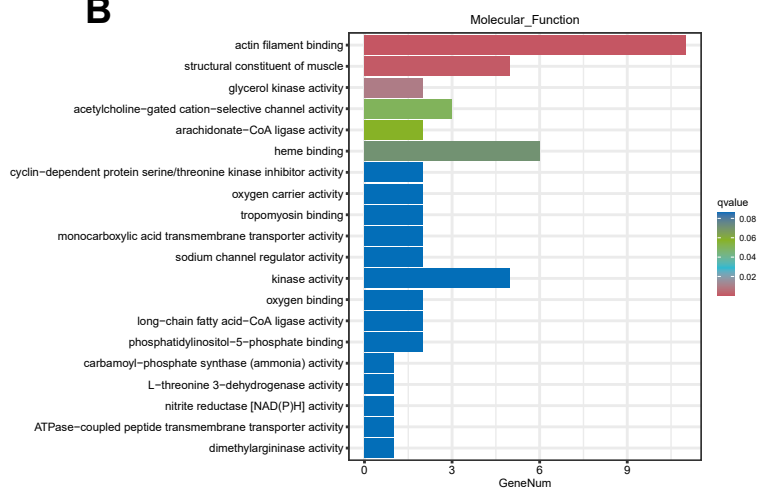

2W-R\_vs\_2W-L

C

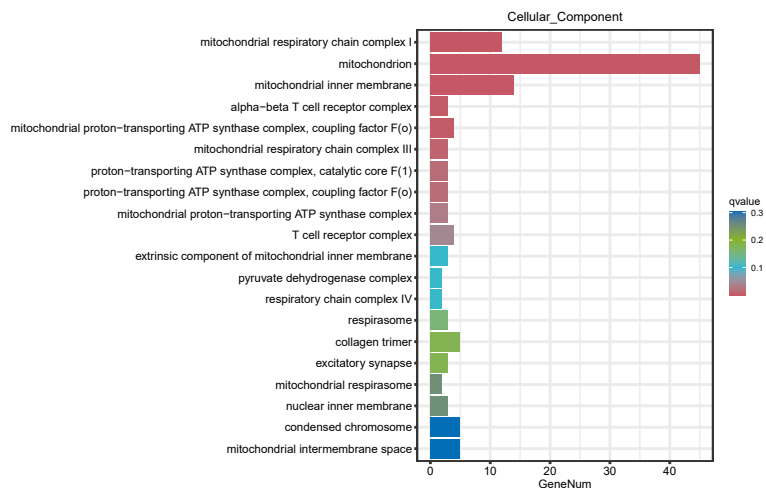

4W-R\_vs\_4W-L

D

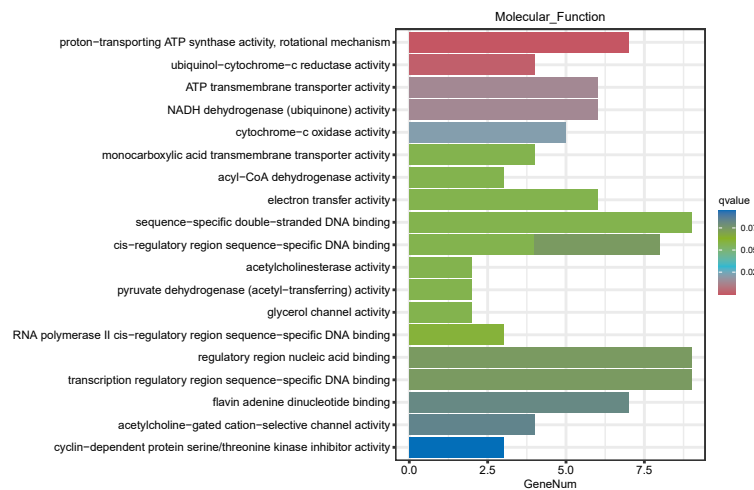

4W-R\_vs\_4W-L

Supplement: s1 [file s1]
